# Supplementary material
Source: PubMed Central journal article supplement (PMC8627462)

Kuhn JH *et al.* (2021) 2021 taxonomic update of phylum *Negarnaviricota* (*Riboviria*: *Orthornavirae*), including the large orders *Bunyavirales* and *Mononegavirales*. Arch Virol 166(11). DOI: 10.1007/s00705-021-05143-6 (November 2021)

## Polyploviricotina

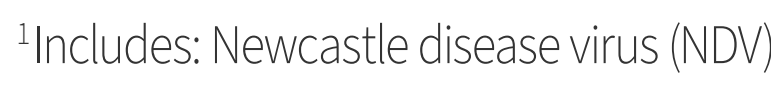

Supplement: NIHMS1744207-supplement-1744207_Sup_Fig.pdf [file NIHMS1744207-supplement-1744207_Sup_Fig.pdf]
